# Supplementary material for: Radical Scavenging Mechanisms of Phenolic Compounds: A Quantitative Structure-Property Relationship (QSPR) Study
Source: PubMed Central journal article supplement (PMC9013829; doi:10.3389/fnut.2022.882458), 2022-04-04
Supplement: Data_Sheet_1.pdf [file Data_Sheet_1.pdf]

## Supplementary Material

### 1 SUPPLEMENTARY DATA

**Table S1.** Raw data to Figure 5: The AUC of all standard reference compounds measured in the ORAC assay in comparison to FC, DPPH and ABTS assays, which are reproduced from Platzer et al. (11, 14).

| Sample code | ORAC AUC [-]                            | ABTS stoichiometry [-] | DPPH stoichiometry [-] | FC reducing capacity [mM <sup>-1</sup> ] |
|-------------|-----------------------------------------|------------------------|------------------------|------------------------------------------|
| GAA         | $0.13 \times 10^5 \pm 0.05 \times 10^5$ | $10.38 \pm 0.54$       | $5.68 \pm 0.21$        | $0.13 \pm 0.01$                          |
| SIA         | $0.51 \times 10^5 \pm 0.04 \times 10^5$ | $5.07 \pm 0.08$        | $1.46 \pm 0.06$        | $0.11 \pm 0.01$                          |
| FEA         | $0.86 \times 10^5 \pm 0.24 \times 10^5$ | $8.34 \pm 0.37$        | $1.14 \pm 0.01$        | $0.08 \pm 0.01$                          |
| SRA         | $0.92 \times 10^5 \pm 0.14 \times 10^5$ | $3.96 \pm 0.08$        | $2.17 \pm 0.10$        | $0.04 \pm 0.01$                          |
| HBA         | $1.09 \times 10^5 \pm 0.13 \times 10^5$ | $2.61 \pm 0.02$        | $0.06 \pm 0.01$        | $0.04 \pm 0.01$                          |
| PCA         | $1.38 \times 10^5 \pm 0.17 \times 10^5$ | $4.95 \pm 0.16$        | $1.25 \pm 0.07$        | $0.07 \pm 0.01$                          |
| CAA         | $1.53 \times 10^5 \pm 0.07 \times 10^5$ | $4.31 \pm 0.13$        | $2.15 \pm 0.03$        | $0.10 \pm 0.01$                          |
| DBA         | $2.04 \times 10^5 \pm 0.16 \times 10^5$ | $2.66 \pm 0.04$        | $3.01 \pm 0.02$        | $0.06 \pm 0.01$                          |
| QGU3        | $1.29 \times 10^5 \pm 0.43 \times 10^5$ | $5.64 \pm 0.43$        | $4.36 \pm 0.47$        | $0.19 \pm 0.01$                          |
| QUR         | $2.18 \times 10^5 \pm 0.23 \times 10^5$ | $16.33 \pm 0.85$       | $3.83 \pm 0.02$        | $0.24 \pm 0.01$                          |
| KAE         | $2.46 \times 10^5 \pm 0.14 \times 10^5$ | $12.81 \pm 1.82$       | $2.96 \pm 0.04$        | $0.16 \pm 0.01$                          |
| MOR         | $3.64 \times 10^5 \pm 0.08 \times 10^5$ | $7.45 \pm 0.34$        | $2.06 \pm 0.03$        | $0.17 \pm 0.01$                          |
| NAN         | $1.29 \times 10^5 \pm 0.12 \times 10^5$ | $9.17 \pm 0.69$        | $0.00 \pm 0.00$        | $0.13 \pm 0.01$                          |
| TAF         | $1.70 \times 10^5 \pm 0.13 \times 10^5$ | $3.76 \pm 0.43$        | $4.63 \pm 0.19$        | $0.20 \pm 0.01$                          |
| HES         | $1.82 \times 10^5 \pm 0.13 \times 10^5$ | $2.66 \pm 0.09$        | $0.30 \pm 0.01$        | $0.13 \pm 0.01$                          |
| PHD         | $2.05 \times 10^5 \pm 0.13 \times 10^5$ | $16.05 \pm 0.40$       | $0.00 \pm 0.00$        | $0.10 \pm 0.01$                          |
| PHT         | $2.83 \times 10^5 \pm 0.42 \times 10^5$ | $19.90 \pm 0.96$       | $0.96 \pm 0.13$        | $0.12 \pm 0.01$                          |
| CAT         | $1.88 \times 10^5 \pm 0.19 \times 10^5$ | $9.47 \pm 0.18$        | $7.84 \pm 0.10$        | $0.16 \pm 0.01$                          |
| EPC         | $1.94 \times 10^5 \pm 0.09 \times 10^5$ | $8.74 \pm 0.12$        | $6.58 \pm 0.84$        | $0.17 \pm 0.01$                          |
